# Supplementary material for: Experimental phasing using zinc anomalous scattering
Source: PubMed Central journal article supplement (PMC3489106; doi:10.1107/s0907444912024420), 2012-08-18
Supplement: d-68-01253-sup1.pdf [file d-68-01253-sup1.pdf]

## Supplementary Material

| PDB code                                           | Crystallization condition                             |                               |                                  |
|----------------------------------------------------|-------------------------------------------------------|-------------------------------|----------------------------------|
| 1D1S<br>(Xie & Hurley, 1999)                       | 0.1M Zinc Acetate<br>0.0075M NAD <sup>+</sup>         | 0.1M Cacodylate pH 6.5        | 18% PEG 6000                     |
| 1FD9<br>(Riboldi-Tunnicliffe <i>et al.</i> , 2001) | 0.5M Zinc Acetate                                     | 0.1M MES pH 6.1–6.5           | 15–20% PEG 8000                  |
| 1K51<br>(O'Neill <i>et al.</i> , 2001)             | 0.225M Zinc Acetate                                   | 0.5M Cacodylate pH 6.5        | 2% PEG8000                       |
| 1K52<br>(O'Neill <i>et al.</i> , 2001)             | 0.12M Zinc Acetate                                    | 0.5M Cacodylate pH 6.5        |                                  |
| 1K53<br>(O'Neill <i>et al.</i> , 2001)             | 0.225M Zinc Acetate                                   | 0.5M Cacodylate pH6.5         |                                  |
| 1NNK<br>(Lunn <i>et al.</i> , 2003)                | 0.1MZinc Acetate                                      | 0.1M Cacodylate pH 5.5        | 20% PEG 8000                     |
| 1UV0 <sup>NR</sup>                                 | 0.2M Zinc Acetate                                     | 0.1M Cacodylate pH 6.0        | 20% PEG 8000<br>5% GLYCEROL      |
| 1UQW <sup>NR</sup>                                 | 0.2M Zinc Acetate                                     | 0.1M Sodium Acetate<br>pH 6.0 | 15% PEG 8000<br>5% GLYCEROL      |
| 1VPY <sup>NR</sup>                                 | 0.2M Zinc Acetate                                     | 0.1M Acetate pH4.5            | 10% PEG-3000                     |
| 2AL4<br>(Jin <i>et al.</i> , 2005)                 | 0.1-0.15M Zinc Acetate                                | 0.1M Sodium Acetate<br>pH 5.5 | 10-14% PEG8000                   |
| 2CH9<br>(Schuttelkopf <i>et al.</i> , 2006)        | 0.18M Zinc Acetate                                    | 0.18 M Acetic Acid<br>pH 4.6  | 9% PEG 3350                      |
| 2GFE<br>(Weston <i>et al.</i> , 2006)              | 0.1M Zinc Acetate                                     | 0.1M Sodium Acetate<br>pH 5.5 | 14% PEG 8K                       |
| 2HBB <sup>NR</sup>                                 | 0.2M Zinc Acetate<br>2.5M NaCl                        | 0.01M Imidazole pH 8.0        |                                  |
| 2IZO<br>(Dore <i>et al.</i> , 2006)                | 0.22M Zinc Acetate<br>0.03M GLYCYL-<br>GLYCYL-GLYCINE | 0.1M Acetate PH 4.8           | 8% PEG 8,000                     |
| 2J6E<br>(Duquerroy <i>et al.</i> , 2007)           | 0.003M Zinc Acetate<br>0.003M CdCl <sub>2</sub>       | 0.1M CacodylatePH 6.5         | 10% MPEG 5000                    |
| 2JGO<br>(Touw <i>et al.</i> , 2007)                | 0.2M Zinc Acetate                                     | 0.1M Imidazole pH 8.0         | 30% PEG-400                      |
| 2W0M<br>(McRobbie <i>et al.</i> , 2009)            | 0.15M Zinc Acetate                                    | 0.1M MES PH 5.5,              | PEG 8K 8.94%                     |
| 2W9N<br>(Komander <i>et al.</i> , 2009)            | 0.2M Zinc Acetate<br>pH 7.0                           |                               | 22% PEG 3350                     |
| 2XK5<br>(Virdee <i>et al.</i> , 2010)              | 0.2M Zinc Acetate<br>pH 7.0                           |                               | 19-20 % PEG 3350                 |
| 2Y7I<br>(Stamp <i>et al.</i> , 2011)               | 0.2M Zinc Acetate                                     | 0.1M Cacodylate pH 7.4        | 18% PEG 8000                     |
| 2ZCB <sup>NR</sup>                                 | 0.2M Zinc Acetate<br>pH 6.3                           |                               | 20% PEG 3350                     |
| 3AAK<br>(Inuzuka <i>et al.</i> , 2010)             | 0.05M Zinc Acetate                                    | 0.1M Cacodylate pH 6.5        | 25% 2-methyl-2,4-<br>pentanediol |
| 3CJJ<br>(Koch <i>et al.</i> , 2010)                | 0.2M Zinc Acetate                                     | 0.1M Cacodylate pH 6.5        | 11% PEG 8000                     |
| 3DP6<br>(Ahmed <i>et al.</i> , 2009)               | 0.1-0.2M Zinc Acetate                                 | 0.1M Cacodylate pH 6.5        | 14-17% PEG 8000                  |
| 3DZA <sup>NR</sup>                                 | 0.2M Zinc Acetate<br>pH 6.3                           |                               | 20% PEG-3350                     |
| 3EER <sup>NR</sup>                                 | 0.2M Zinc Acetate                                     | 0.1M Imidazole pH 8.0         | 20% PEG 3000                     |
| 3FAV <sup>NR</sup>                                 | 0.2M Zinc Acetate                                     | 0.1M Imidazol pH 6.5          | 33% PEG 600                      |
| 3FM4 <sup>NR</sup>                                 | 0.1M Zinc Acetate                                     | 0.1M Cacodylate pH 6.5        | 16% PEG 8000                     |

|                                          |                                                     |                                 |                                      |
|------------------------------------------|-----------------------------------------------------|---------------------------------|--------------------------------------|
| 3FJU<br>(Sanglas <i>et al.</i> , 2009)   | 0.2M Zinc Acetate                                   | 0.1M Cacodylate pH 6.5          | 9% PEG 8000                          |
| 3H6T<br>(Hald <i>et al.</i> , 2009)      | 0.3M Zinc Acetate                                   | 0.1M Cacodylate pH 6.5          | 25 % PEG 4000                        |
| 3IOT<br>(Kim <i>et al.</i> , 2009)       | 0.2M Zinc Acetate<br>0.2M Sodium Acetate            | 0.1M Cacodylate pH 6.5-<br>7.4  | 12% PEG 4000                         |
| 3IVB <sup>NR</sup>                       | 50mM Zinc Acetate                                   | 0.1M Tris pH 7.6                | 10-20% PEG3350                       |
| 3M3L<br>(Ahmed <i>et al.</i> , 2010)     | 0.1-0.15M Zinc Acetate<br>0.25M Ammonium<br>Sulfate | 0.1M Cacodylate pH 6.5          | 14-15% PEG 8000                      |
| 3M52<br>(Stogios <i>et al.</i> , 2010)   | 0.075M Zinc Acetate<br>pH 4.6                       |                                 |                                      |
| 3M6Q<br>(Fieulaine <i>et al.</i> , 2011) | 0.1M Zinc Acetate                                   |                                 | 20% PEG-3350                         |
| 3MCX <sup>NR</sup>                       | 0.2M Zinc Acetate                                   | 0.1M Cacodylate pH 6.5          | 2% 2-propanol                        |
| 3OAX<br>(Makino <i>et al.</i> , 2010)    | 0.065 M Zinc Acetate<br>0.85 M Ammonium<br>Sulfate  | 0.03 M MES pH 6.0               | 0.005 M $\beta$ -<br>mercaptoethanol |
| 3P2X <sup>NR</sup>                       | 0.04% Zinc Acetate                                  | 0.05M Sodium Citrate<br>pH 8.3  | 1% phenol                            |
| 3P33 <sup>NR</sup>                       | 0.04% Zinc Acetate                                  | 0.05M Sodium Citrate<br>pH 8.3  | 1% phenol                            |
| 3R3Q<br>(Ren & Hurley, 2011)             | 0.2M Zinc Acetate                                   | 0.1M Imidazole pH 8.0           | 25% 1,2-propanediol<br>10% glycerol  |
| 3RF4<br>(Cho <i>et al.</i> , 2011)       | 0.16-0.24 M Zinc<br>Acetate                         | 0.1M Imidazole pH 8.0           | 15-25% PEG3000                       |
| 3RTF<br>(Poon <i>et al.</i> , 2011)      | 0.1-0.15M Zinc Acetate<br>0.25M Ammonium<br>Sulfate | 0.1M SodiumCacodylate<br>pH 6.5 | 14-15% PEG8000                       |
| 3S9C<br>(Nakayama <i>et al.</i> , 2011)  | 0.2M Zinc Acetate<br>pH 6.0                         |                                 | 20% PEG 3350                         |

\*NR: No reported primary citation

## References

- Ahmed, A. H., Ptak, C. P. & Oswald, R. E. (2010). *Biochemistry* **49**, 2843-2850.
- Ahmed, A. H., Wang, Q., Sondermann, H. & Oswald, R. E. (2009). *Proteins* **75**, 628-637.
- Cho, Y., Vermeire, J. J., Merkel, J. S., Leng, L., Du, X., Bucala, R., Cappello, M. & Lolis, E. (2011). *Chemistry & biology* **18**, 1089-1101.
- Dore, A. S., Kilkenny, M. L., Jones, S. A., Oliver, A. W., Roe, S. M., Bell, S. D. & Pearl, L. H. (2006). *Nucleic acids research* **34**, 4515-4526.
- Duquerroy, S., Stura, E. A., Bressanelli, S., Fabiane, S. M., Vaney, M. C., Beale, D., Hamon, M., Casali, P., Rey, F. A., Sutton, B. J. & Taussig, M. J. (2007). *Journal of molecular biology* **368**, 1321-1331.
- Fieulaine, S., Boularot, A., Artaud, I., Desmadril, M., Dardel, F., Meinnel, T. & Giglione, C. (2011). *PLoS biology* **9**, e1001066.
- Hald, H., Ahring, P. K., Timmermann, D. B., Liljefors, T., Gajhede, M. & Kastrop, J. S. (2009). *Journal of molecular biology* **391**, 906-917.
- Inuzuka, T., Suzuki, H., Kawasaki, M., Shibata, H., Wakatsuki, S. & Maki, M. (2010). *BMC structural biology* **10**, 25.
- Jin, R., Clark, S., Weeks, A. M., Dudman, J. T., Gouaux, E. & Partin, K. M. (2005). *The Journal of neuroscience : the official journal of the Society for Neuroscience* **25**, 9027-9036.
- Kim, M. W., Chelliah, Y., Kim, S. W., Otwinowski, Z. & Bezprozvanny, I. (2009). *Structure* **17**, 1205-1212.
- Koch, M., Chitayat, S., Dattilo, B. M., Schiefner, A., Diez, J., Chazin, W. J. & Fritz, G. (2010). *Structure* **18**, 1342-1352.
- Komander, D., Reyes-Turcu, F., Licchesi, J. D., Odenwaelder, P., Wilkinson, K. D. & Barford, D. (2009). *EMBO reports* **10**, 466-473.

- Lunn, M. L., Hogner, A., Stensbol, T. B., Gouaux, E., Egebjerg, J. & Kastrop, J. S. (2003). *Journal of medicinal chemistry* **46**, 872-875.
- Makino, C. L., Riley, C. K., Looney, J., Crouch, R. K. & Okada, T. (2010). *Biophysical journal* **99**, 2366-2373.
- McRobbie, A. M., Carter, L. G., Kerou, M., Liu, H., McMahon, S. A., Johnson, K. A., Oke, M., Naismith, J. H. & White, M. F. (2009). *Journal of molecular biology* **389**, 661-673.
- Nakayama, D., Ben Ammar, Y., Miyata, T. & Takeda, S. (2011). *FEBS letters* **585**, 3020-3025.
- O'Neill, J. W., Kim, D. E., Johnsen, K., Baker, D. & Zhang, K. Y. (2001). *Structure* **9**, 1017-1027.
- Poon, K., Ahmed, A. H., Nowak, L. M. & Oswald, R. E. (2011). *Molecular pharmacology* **80**, 49-59.
- Ren, X. & Hurley, J. H. (2011). *The EMBO journal* **30**, 2130-2139.
- Riboldi-Tunnicliffe, A., Konig, B., Jessen, S., Weiss, M. S., Rahfeld, J., Hacker, J., Fischer, G. & Hilgenfeld, R. (2001). *Nature structural biology* **8**, 779-783.
- Sanglas, L., Aviles, F. X., Huber, R., Gomis-Ruth, F. X. & Arolas, J. L. (2009). *Proceedings of the National Academy of Sciences of the United States of America* **106**, 1743-1747.
- Schuttelkopf, A. W., Hamilton, G., Watts, C. & van Aalten, D. M. (2006). *The Journal of biological chemistry* **281**, 16570-16575.
- Stamp, A. L., Owen, P., El Omari, K., Lockyer, M., Lamb, H. K., Charles, I. G., Hawkins, A. R. & Stammers, D. K. (2011). *Proteins* **79**, 2352-2357.
- Stogios, P. J., Cuesta-Seijo, J. A., Chen, L., Pomroy, N. C. & Prive, G. G. (2010). *Journal of molecular biology* **400**, 983-997.
- Touw, D. S., Nordman, C. E., Stuckey, J. A. & Pecoraro, V. L. (2007). *Proceedings of the National Academy of Sciences of the United States of America* **104**, 11969-11974.
- Virdee, S., Ye, Y., Nguyen, D. P., Komander, D. & Chin, J. W. (2010). *Nature chemical biology* **6**, 750-757.
- Weston, M. C., Gertler, C., Mayer, M. L. & Rosenmund, C. (2006). *The Journal of neuroscience : the official journal of the Society for Neuroscience* **26**, 7650-7658.
- Xie, P. T. & Hurley, T. D. (1999). *Protein science : a publication of the Protein Society* **8**, 2639-2644.
